# Supplementary material
Source: PubMed Central journal article supplement (PMC9610898)
Supplement: bcd-21-0222_figure_s1_supps1.pdf [file bcd-21-0222_figure_s1_supps1.pdf]

## Supplementary Figure S1

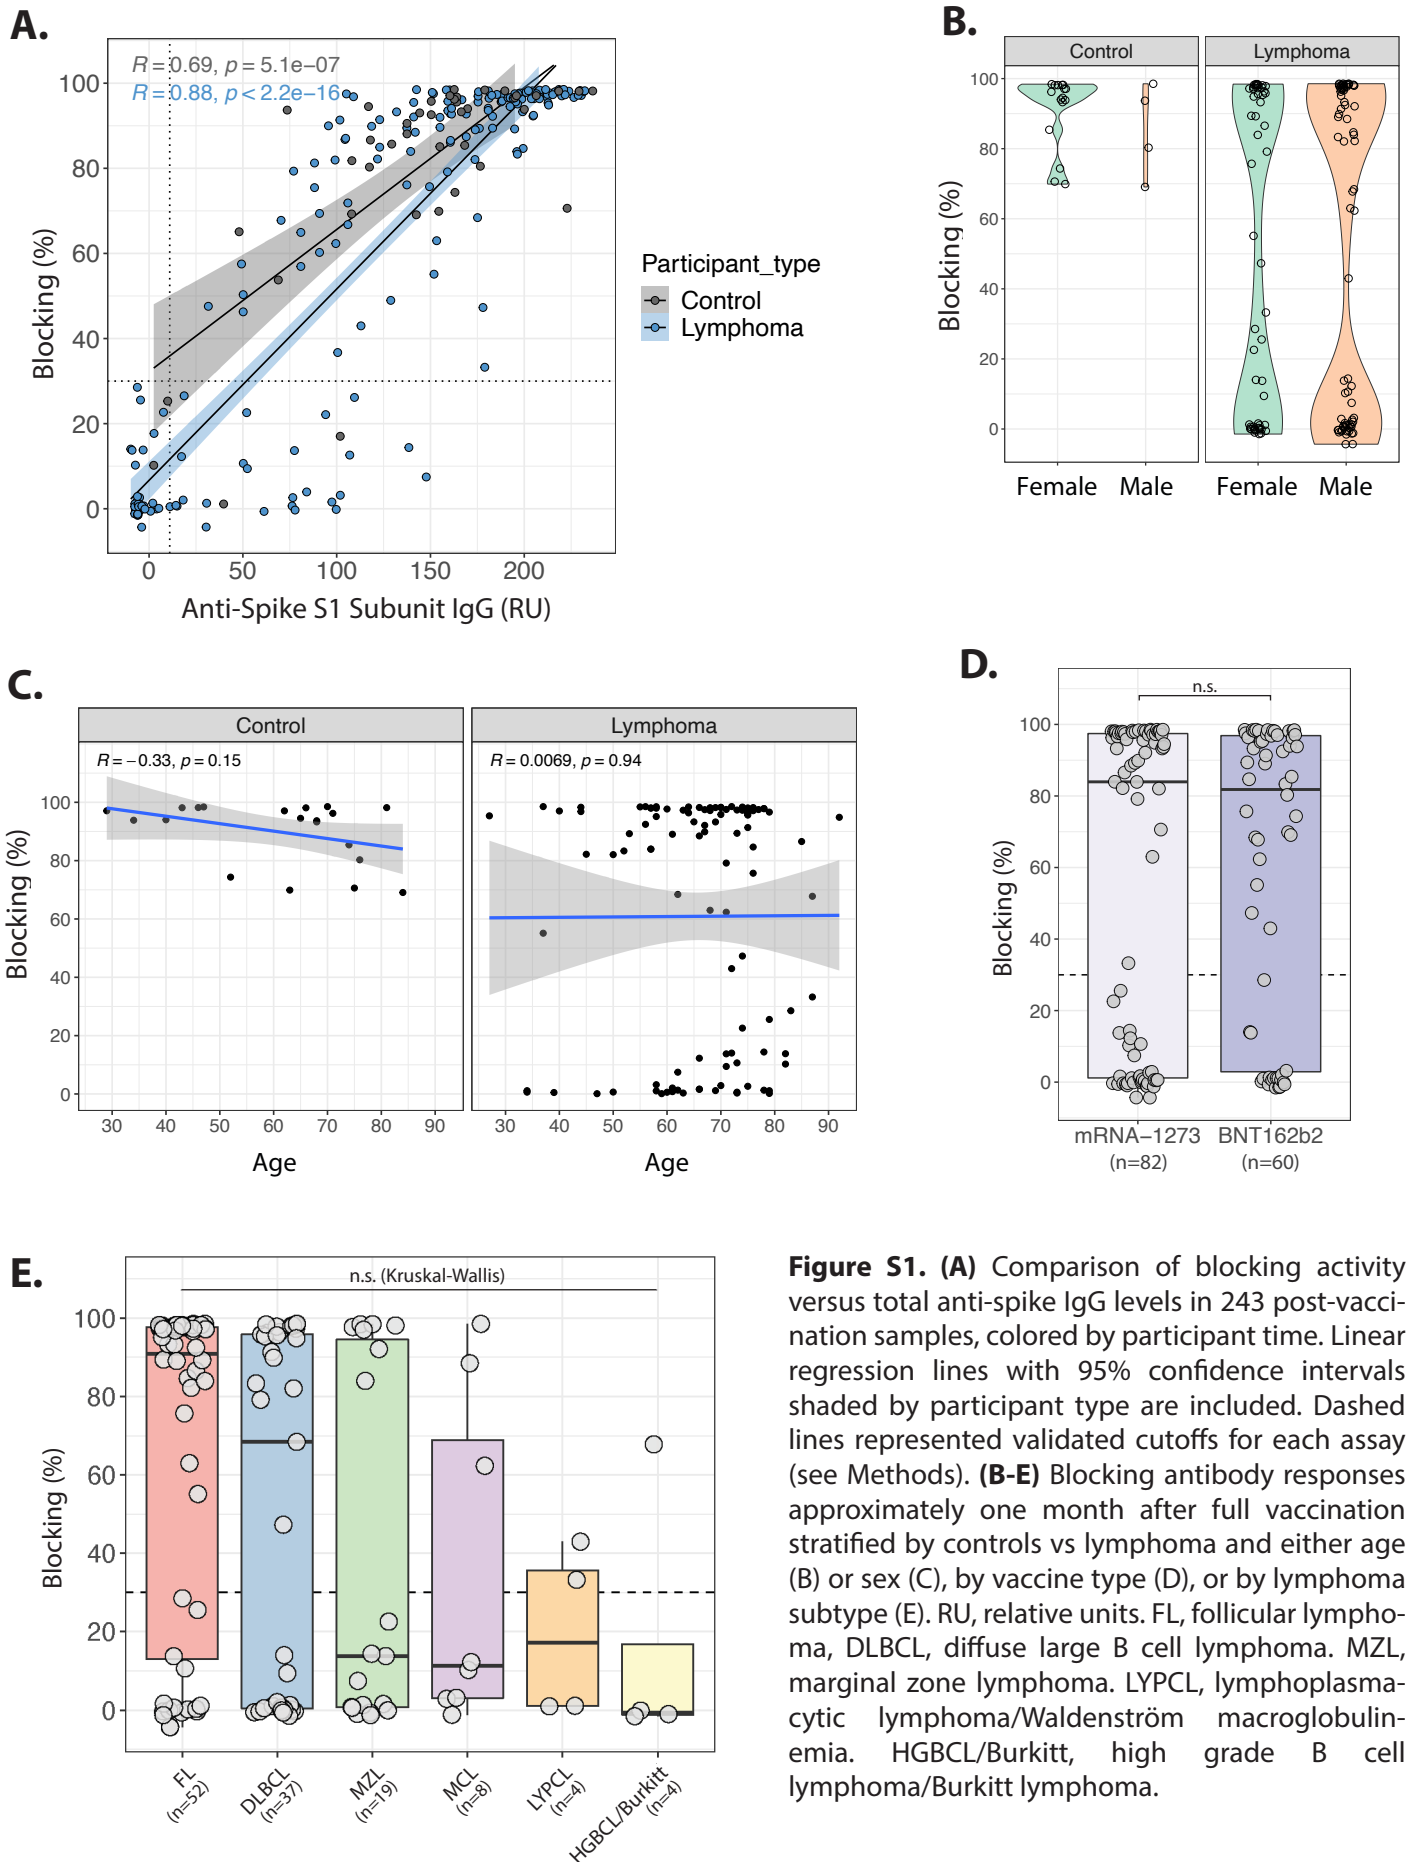

**Figure S1. (A)** Comparison of blocking activity versus total anti-spike IgG levels in 243 post-vaccination samples, colored by participant time. Linear regression lines with 95% confidence intervals shaded by participant type are included. Dashed lines represented validated cutoffs for each assay (see Methods). **(B-E)** Blocking antibody responses approximately one month after full vaccination stratified by controls vs lymphoma and either age (B) or sex (C), by vaccine type (D), or by lymphoma subtype (E). RU, relative units. FL, follicular lymphoma, DLBCL, diffuse large B cell lymphoma. MZL, marginal zone lymphoma. LYPCL, lymphoplasmacytic lymphoma/Waldenström macroglobulinemia. HGBCL/Burkitt, high grade B cell lymphoma/Burkitt lymphoma.
