# Supplementary material
Source: PubMed Central journal article supplement (PMC9610898)
Supplement: bcd-21-0222_figure_s3_supps3.pdf [file bcd-21-0222_figure_s3_supps3.pdf]

## Supplementary Figure S3

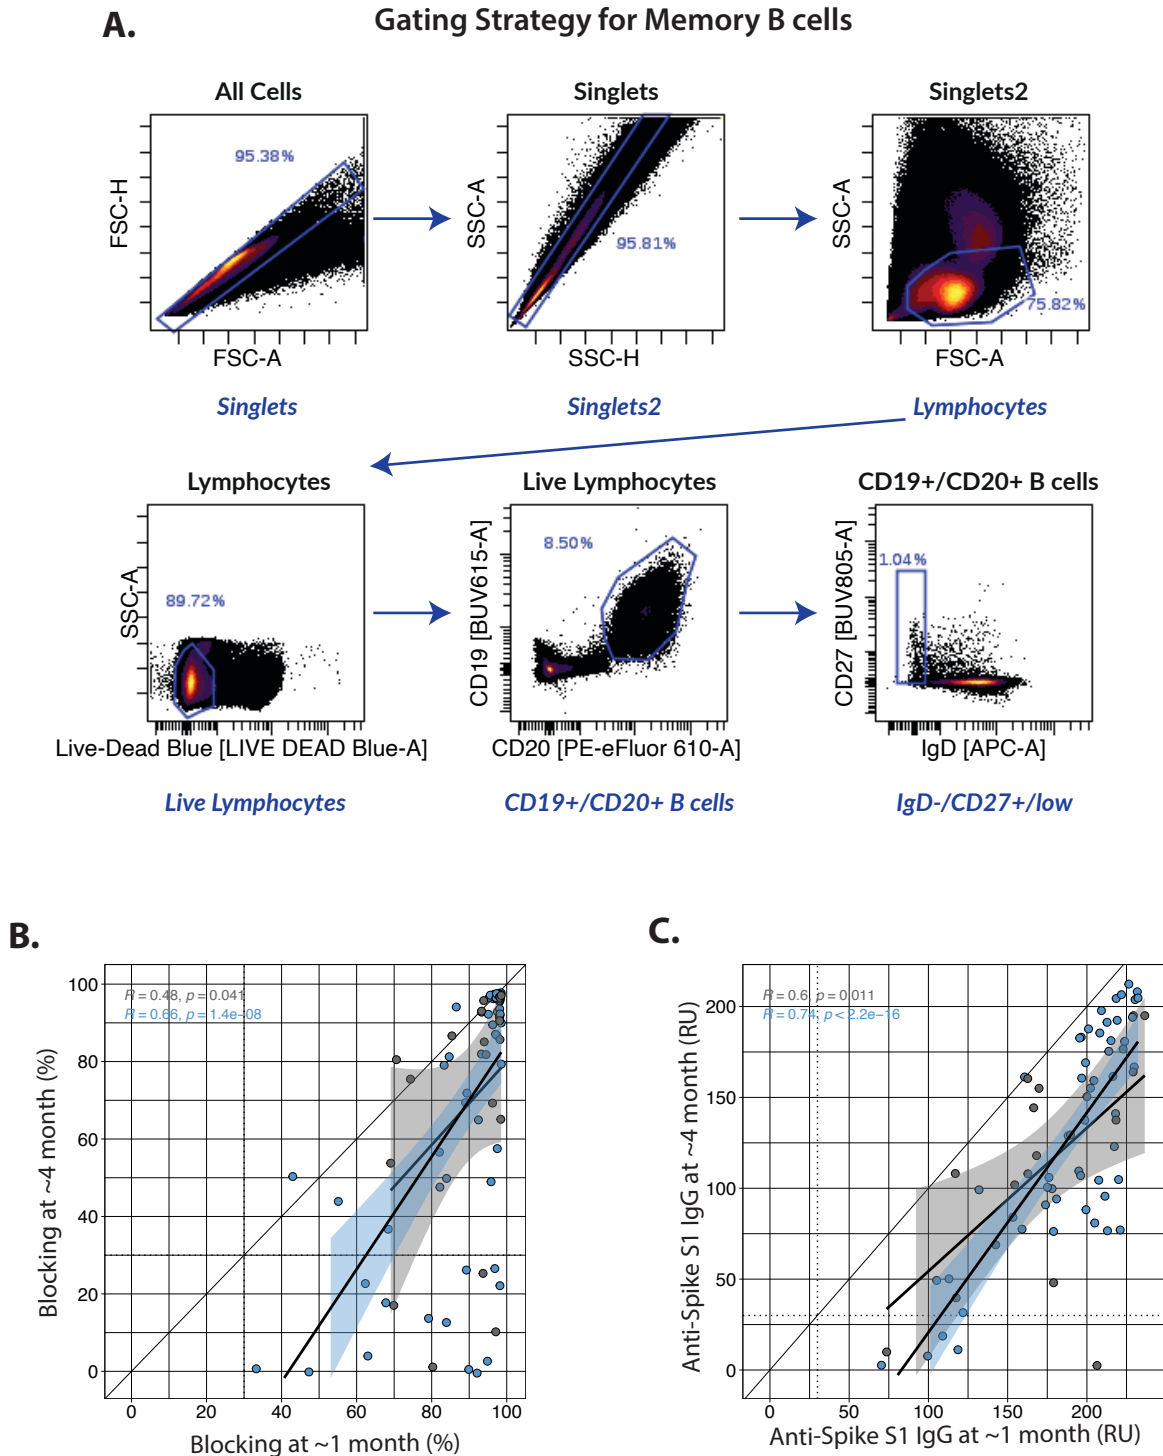

**Figure S3. (A)** Gating strategy for memory B-cells. **(B-C)** RBD blocking activity (B) and total anti-spike IgG (C) results compared between timepoints within the same participant, colored by participant type. Linear regression lines with 95% confidence intervals shaded by participant type are included. Dashed lines represented validated cutoffs for each assay (see Methods). RU, relative units.
